# Supplementary material
Source: PubMed Central journal article supplement (PMC2043540)

Figure S 1 (Saaf et al.)

A

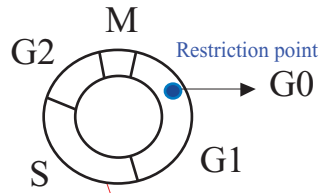

B

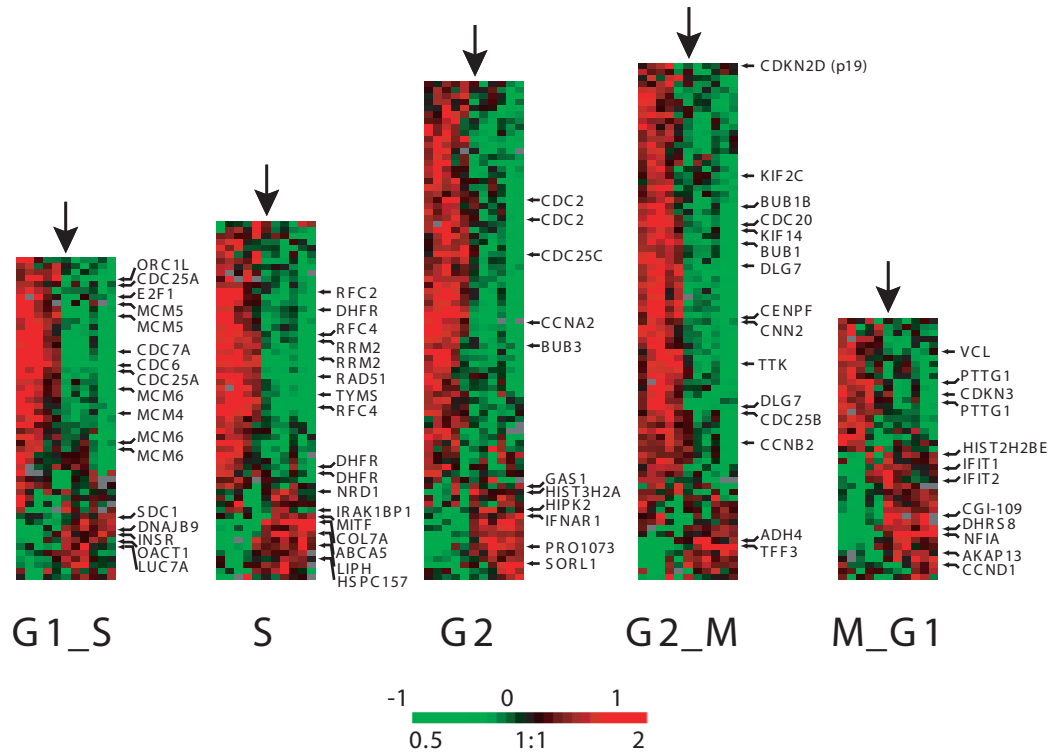

Figure S2 (Saaf et al.)

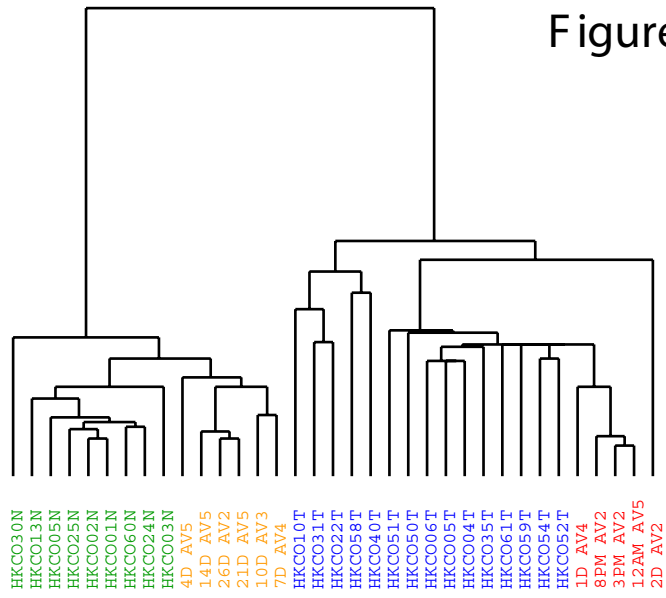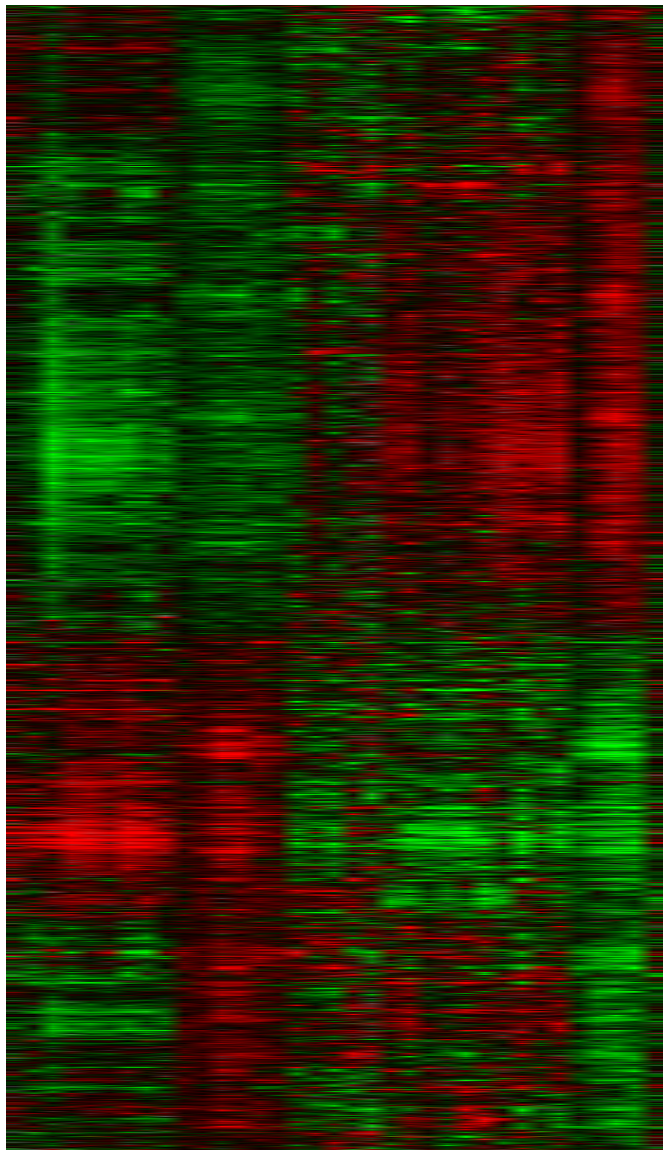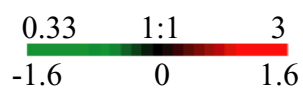

Figure S3 (Saaf et al.)

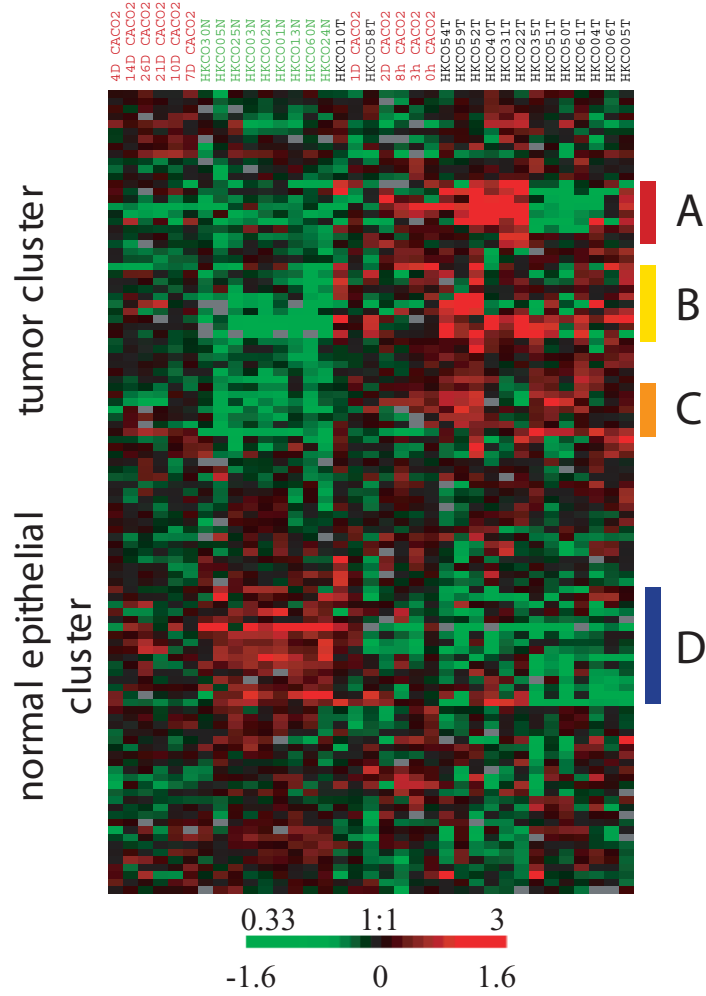

**A**

- NKD2
- FZD3
- WNT11
- AXIN2
- FZD4 (S)
- APCDD1
- CSNK1E
- CTNBBL1

**B**

- DKK1
- WNT5A
- WNT5A
- WNT5A
- LEF1
- DKK4
- VANGL1
- SFRP4
- WNT2

**C**

- CSNK1A1
- CSNKE
- CTNNBIP1
- TCFL1
- CSNK1A1
- FZD6
- WISP1

**D**

- TCF7L1
- SFRP2
- FZD8
- FZD5
- FZD4
- SFRP1
- DAAM2
- WISP2
- WISP2

- TLE4
- WNT5B
- WNT5B
- CSNK1G2
- CSNK1A1
- FRZB
- TLE2

Figure S 4 (Saaf et al.)

A

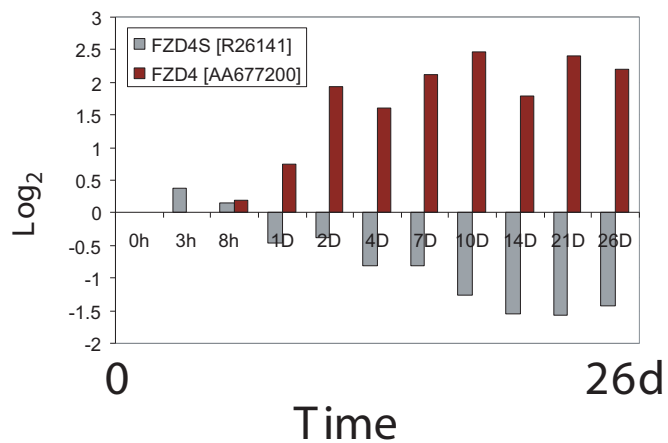

B

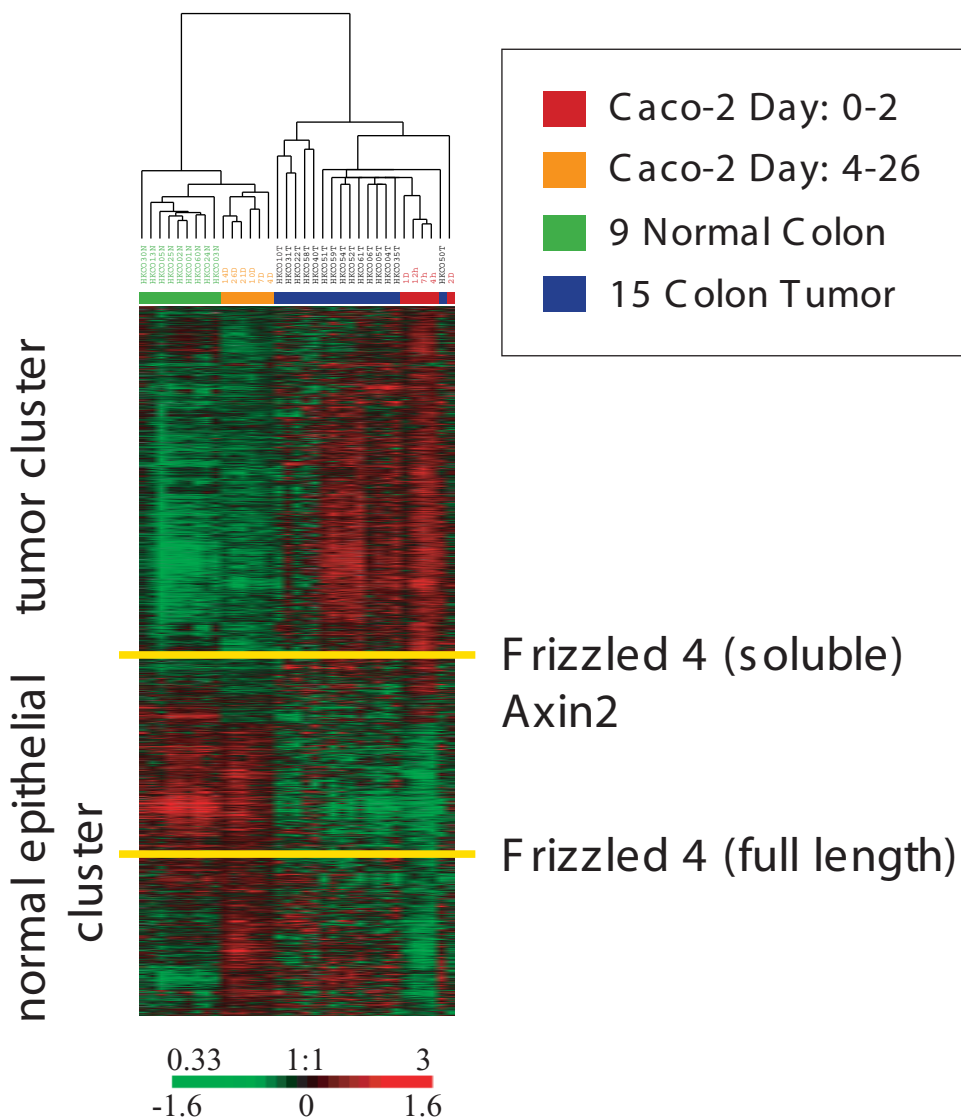

Supplement: mbc_E07-04-0309_1.pdf [file mbc_E07-04-0309_1.pdf]
